# Supplementary material for: Exploiting the biomolecular corona: pre-coating of nanoparticles enables controlled cellular interactions
Source: Royal Society of Chemistry journal article supplement (doi:10.1039/c8nr03331e), 2018-01-01
Supplement: c8nr03331e1.pdf [file c8nr03331e1.pdf]

## ***Supplementary information***

# **Exploiting the biomolecular corona: Pre-coating of nanoparticles enables controlled cellular interactions**

**Johanna Simon<sup>a,b,1</sup>, Laura K. Müller<sup>b</sup>, Maria Kokkinopoulou<sup>b</sup>, Ingo Lieberwirth<sup>b</sup>, Katharina Landfester<sup>b</sup>, Svenja Morsbach<sup>b</sup>, Volker Mailänder<sup>a,b\*</sup>**

<sup>a</sup> Dermatology Clinic, University Medical Center of the Johannes Gutenberg-University Mainz, Langenbeckstr. 1, 55131 Mainz, Germany.

<sup>b</sup> Max Planck Institute for Polymer Research, Ackermannweg 10, 55128 Mainz, Germany.

\*Corresponding author

# Content

|                                                                      |   |
|----------------------------------------------------------------------|---|
| 1 . LC-MS analysis .....                                             | 2 |
| 2. Physico-chemical characterization of nanoparticles .....          | 3 |
| 3. Qualitative and quantitative analysis of the protein corona ..... | 3 |
| 4. Investigating corona formation via ITC and DLS.....               | 6 |

## 1 . LC-MS analysis

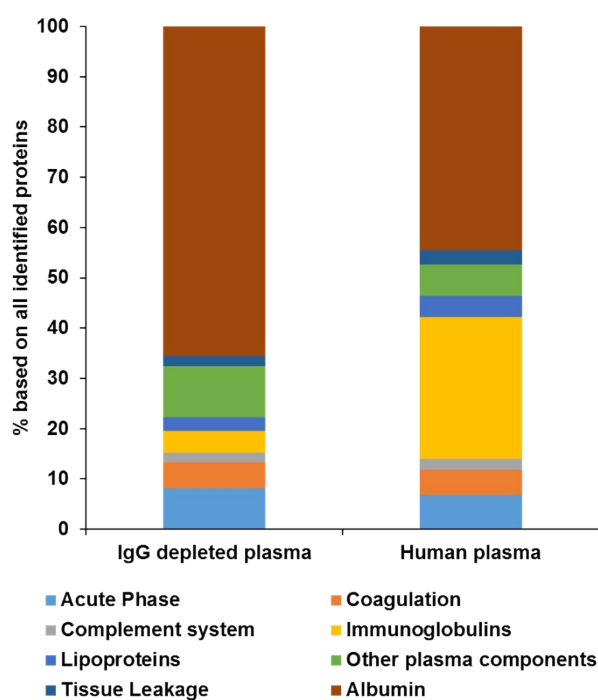

**Figure S 1.** LC-MS analysis of human plasma and IgG depleted plasma. Proteins were classified into 8 different classes according to their biological function. Values are given in % based on all identified proteins. A full list of all identified proteins is supplemented in a separate Excel File Table S 1.

**Table S1.** All identified proteins for plasma, IgG depleted plasma and after corona formation are summarized in a separate Excel File giving their relative abundance in % and the absolute amount in fmol.

## 2. Physico-chemical characterization of nanoparticles

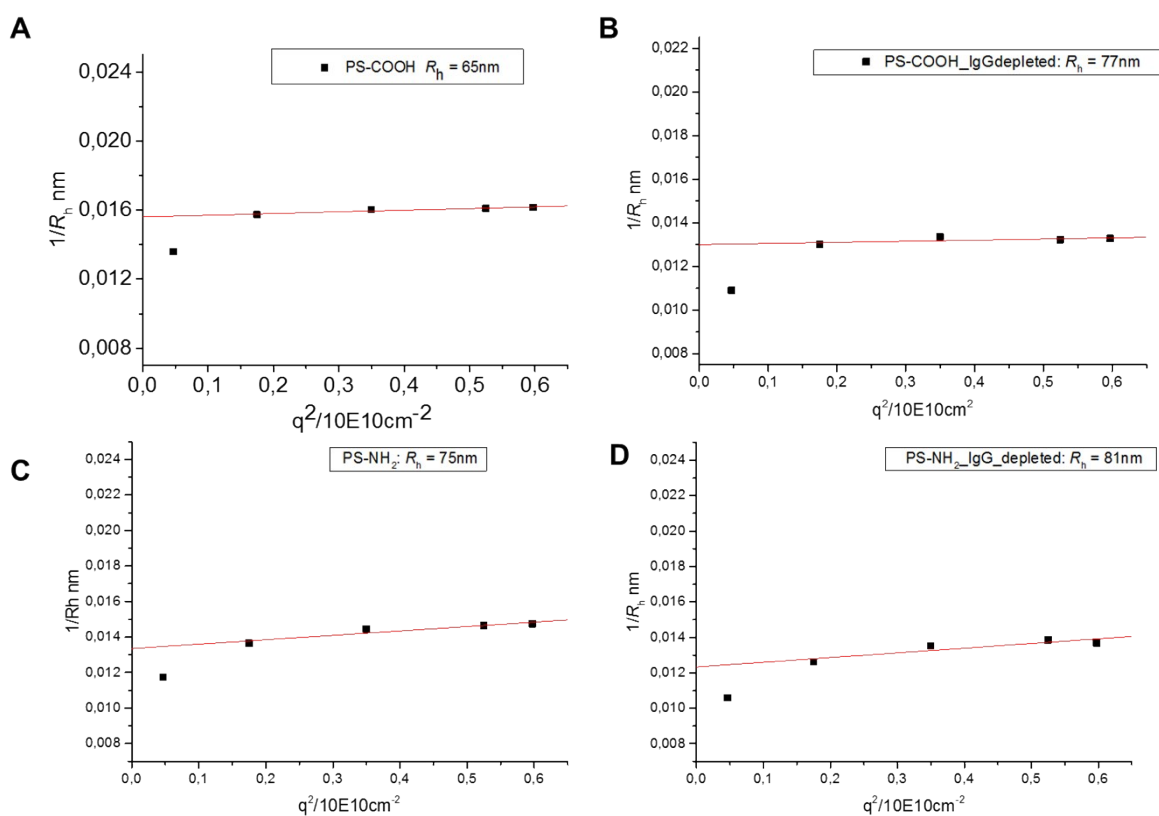

**Figure S 2.** Multi-angle dynamic light scattering (DLS) analysis. Angular dependency of the hydrodynamic radius  $R_h$  for uncoated (A, C) and pre-coated (B, D) nanoparticles. PS-COOH are shown in (A, B) and PS-NH<sub>2</sub> in (C, D).

### 3. Qualitative and quantitative analysis of the protein corona

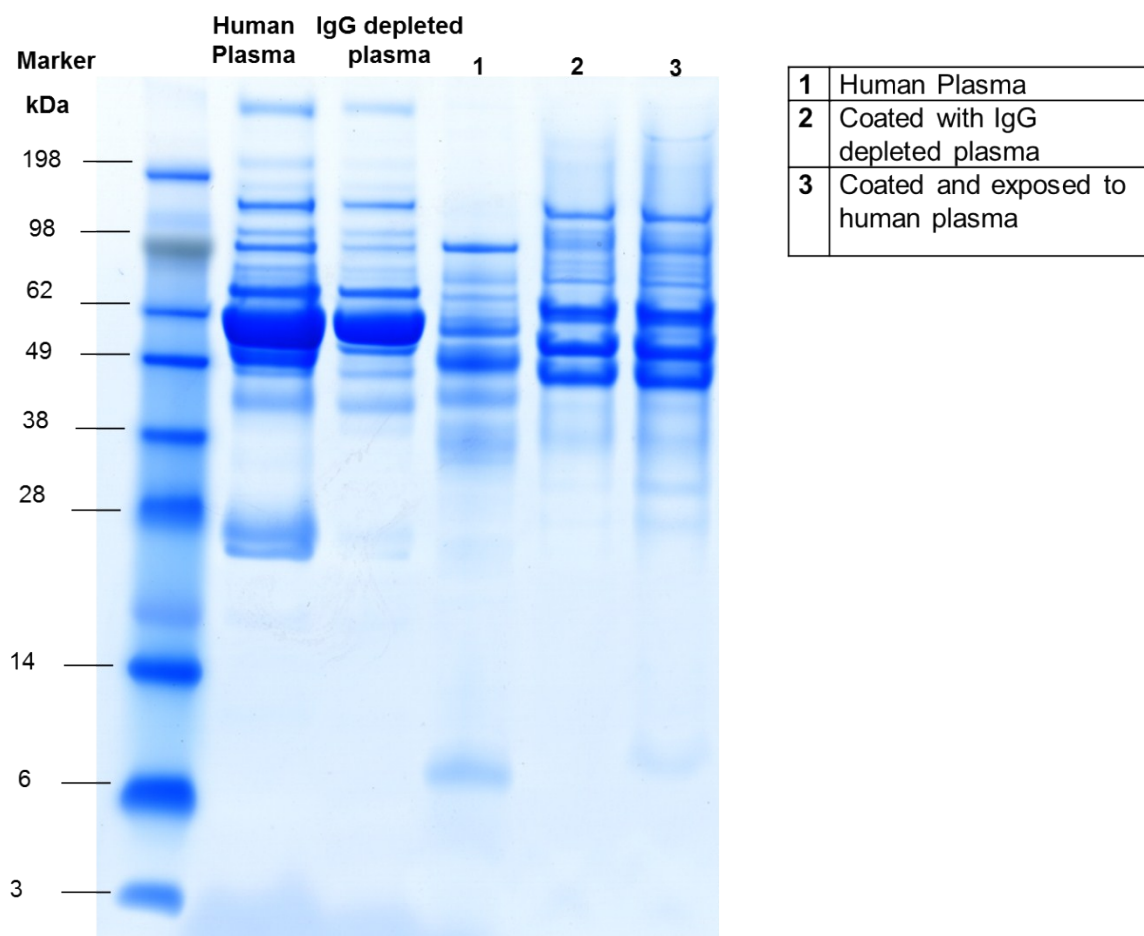

**Figure S 3.** SDS PAGE analysis of the hard corona pattern of PS-COOH nanoparticles. Human plasma and IgG depleted plasma serve as a reference. PS-COOH nanoparticles were incubated with human plasma (1), coated with IgG depleted plasma (2) or pre-coated and re-exposed to human plasma (3). The hard corona was isolated via repetitive centrifugation and redispersion as described in the material/methods part below.

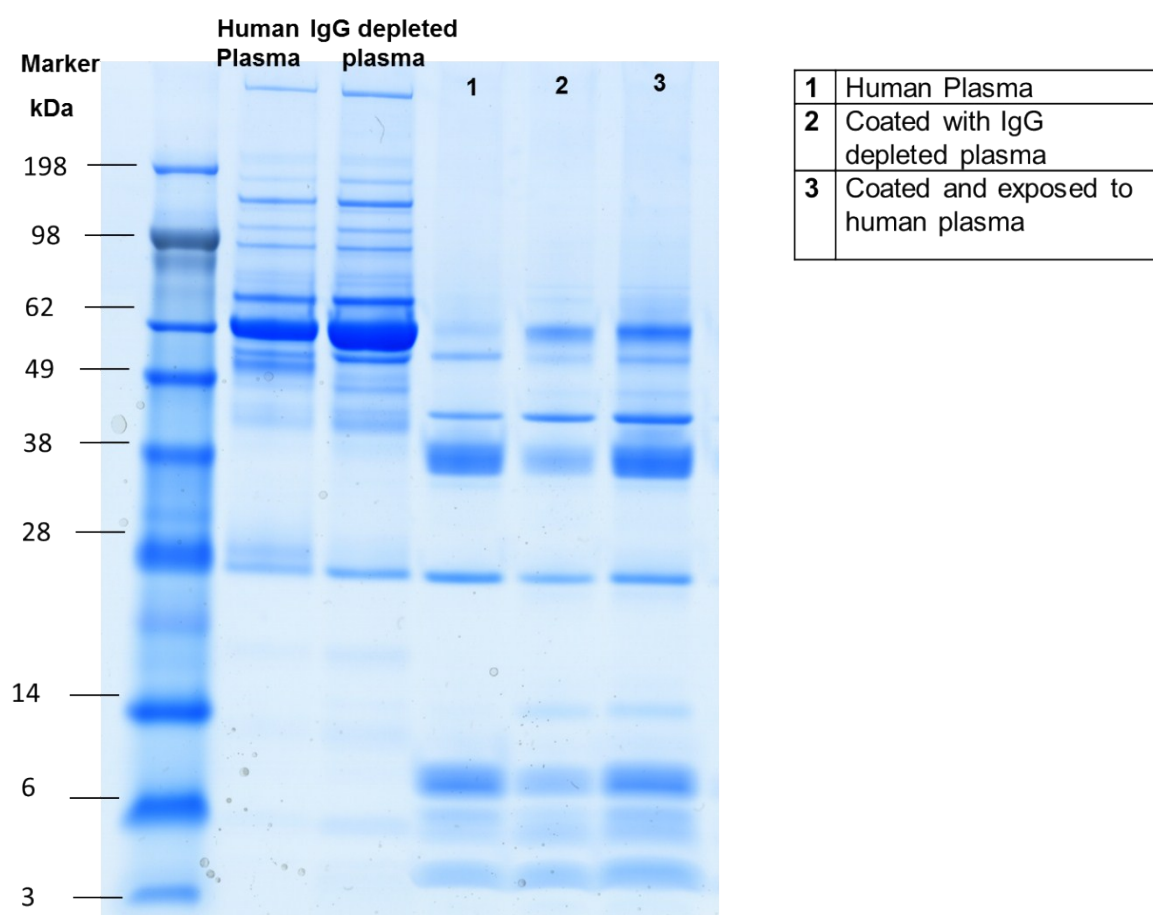

**Figure S 4.** SDS PAGE analysis of the hard corona pattern of PS-NH<sub>2</sub> nanoparticles. Nanoparticles were incubated with human plasma (1), coated with IgG depleted plasma (2) or pre-coated and re-exposed to human plasma (3). The hard corona was isolated as described in the material/methods part below.

**Table S 2.** Protein quantification via Pierce Assay of the hard protein corona. Values are given in mg per m<sup>2</sup> NP surface area  $\pm$  s.d. of three independent experiments.

| in mg/m <sup>2</sup> | Human Plasma    | IgG depleted plasma | Coated and exposed to human plasma |
|----------------------|-----------------|---------------------|------------------------------------|
| PS-COOH              | 1.30 $\pm$ 0.13 | 3.10 $\pm$ 0.22     | 4.20 $\pm$ 0.47                    |
| PS-NH <sub>2</sub>   | 0.96 $\pm$ 0.03 | 0.51 $\pm$ 0.08     | 1.06 $\pm$ 0.04                    |

#### 4. Investigating corona formation via ITC and DLS

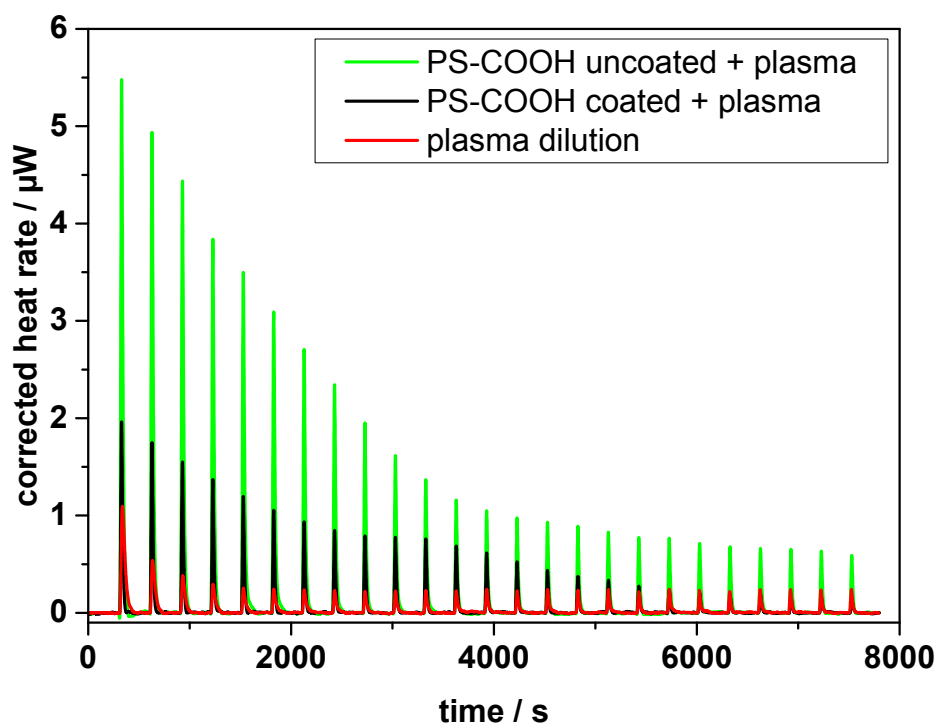

**Figure S 5.** Corrected heat rates of isothermal titration calorimetry experiments (ITC) experiments. The plasma dilution describes the titration of plasma into water and was subtracted from the adsorption measurements after integration.

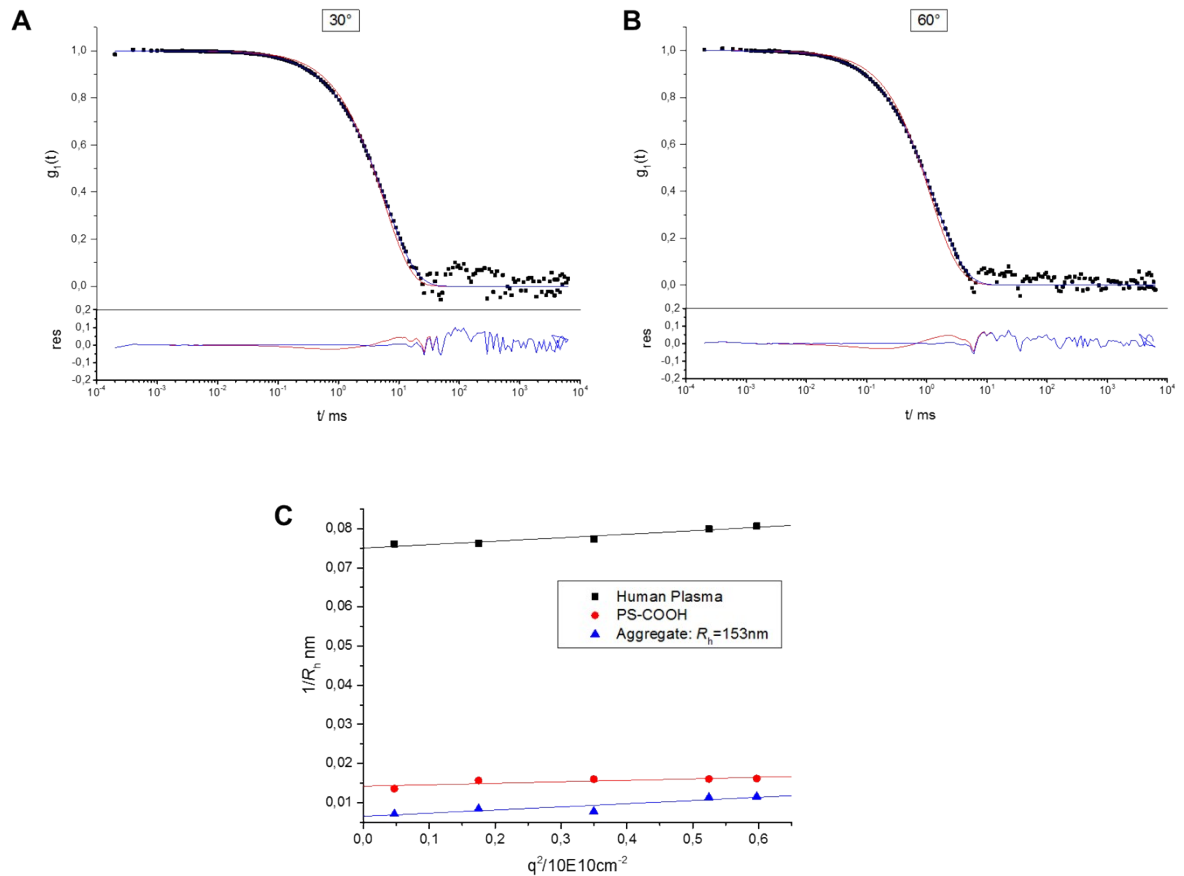

**Figure S 6:** Multi-angle dynamic light scattering analysis: *Upper graph:* Autocorrelation function  $g_1(t)$  (black circles) of PS-COOH nanoparticles incubated with human plasma at a scattering angle  $\theta = 30^\circ$  (A) or  $\theta = 60^\circ$  (B). The red line (—) represents the forced fit and the blue line (—) represents the fit with an additional aggregation term. *Lower graph:* Difference between the data and the two fits. C) Angular dependency of the hydrodynamic radius  $R_h$  of PS-COOH nanoparticles (red), human plasma (black) and the aggregated formed in plasma (red).

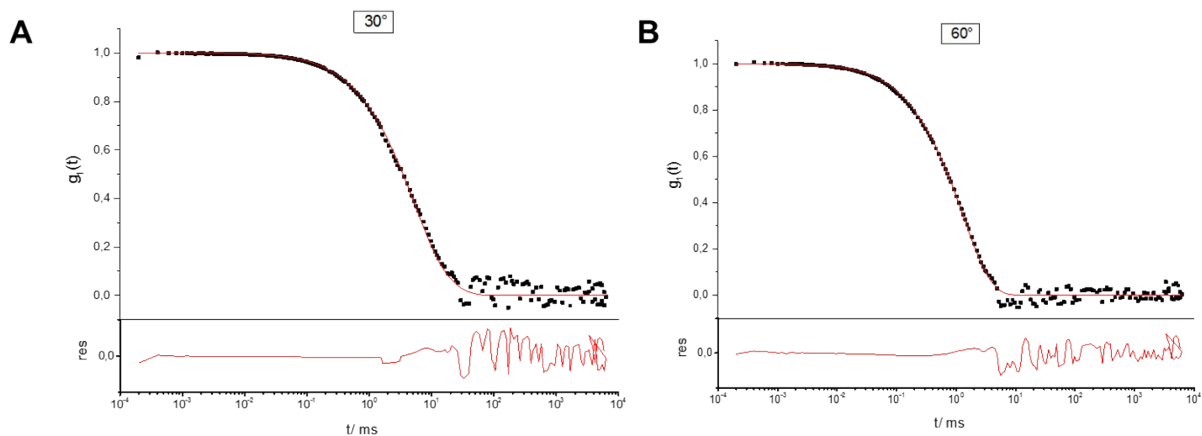

**Figure S 7.** Multi-angle dynamic light scattering analysis: *Upper graph:* Autocorrelation function  $g_1(t)$  (black dots) of pre-coated PS-COOH nanoparticles incubated with human plasma at a scattering angle  $\theta = 30^\circ$  (A) or  $\theta = 60^\circ$  (B). The red line (—) represents the forced fit. There is no additional aggregation term needed indicating that the pre-coated nanoparticles remain stable in human plasma.
